# Supplementary material for: A highly stable and biocompatible optical bioimaging nanoprobe based on carbon nanospheres
Source: Royal Society of Chemistry journal article supplement (doi:10.1039/c6ra02754g), 2016-01-01
Supplement: c6ra02754g1.pdf [file c6ra02754g1.pdf]

## Electronic Supplementary Information

### **A highly stable and biocompatible optical bioimaging nanoprobe based on carbon nanosphere**

*Xiaolong Liu<sup>a,b</sup>, Zuwu Wei<sup>a,b</sup>, Ming Wu<sup>a,b</sup>, Xiaolong Zhang<sup>a,b</sup>, Da Zhang<sup>a,b</sup>, Buhong Li<sup>d\*</sup>, Jingfeng Liu<sup>a,b,c\*</sup>*

<sup>a</sup> The Liver Center of Fujian Province, Fujian Medical University, Fuzhou, People's Republic of China

<sup>b</sup> The United Innovation of Mengchao Hepatobiliary Technology Key Laboratory of Fujian Province, Mengchao Hepatobiliary Hospital of Fujian Medical University, Fuzhou, People's Republic of China

<sup>c</sup> Liver Disease Center, the First Affiliated Hospital of Fujian Medical University, Fuzhou, People's Republic of China

<sup>d</sup> Key Laboratory of OptoElectronic Science and Technology for Medicine of Ministry of Education, Fujian Provincial Key Laboratory for Photonics Technology, Fujian Normal University, Fuzhou, People's Republic of China

\*Corresponding Author (correspondence should be address to Buhong Li and Jingfeng Liu), Postal Address: Xihong Road 312, Fuzhou 350025, Fujian Province, P.R. China, Tel.: +86591-83705927 Fax.: +86591-83705927

E-mail addresses: bhli@fjnu.edu.cn, drjingfeng@126.com

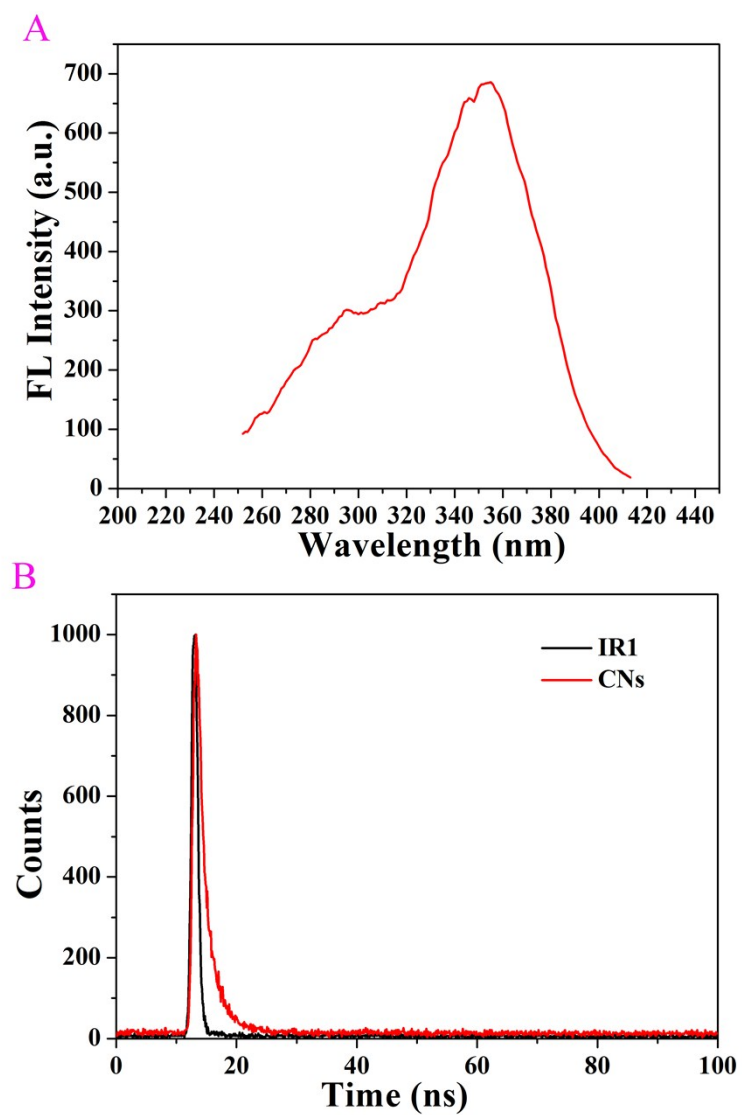

**Fig. S1** (A) Fluorescence excitation spectra of the CNs aqueous solutions ( $\lambda_{\text{em}} = 436 \text{ nm}$ ), (B) Fluorescence decay curves of CNs at 436 nm ( $\lambda_{\text{ex}} = 405 \text{ nm}$ ).

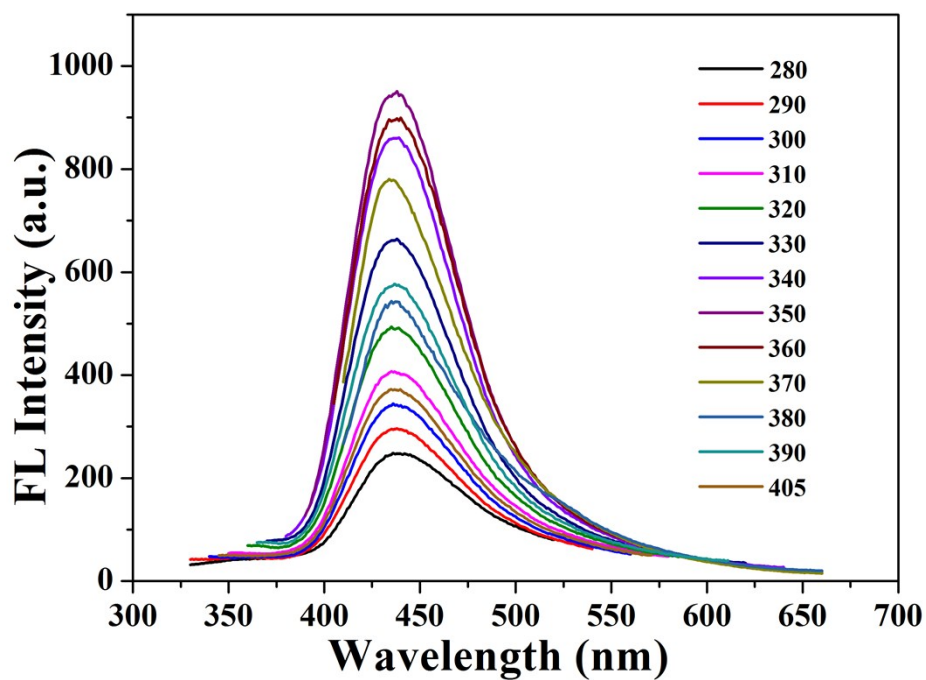

**Fig. S2** Fluorescence emission spectra of the CNs at different excitation ranged from 280 to 405 nm.

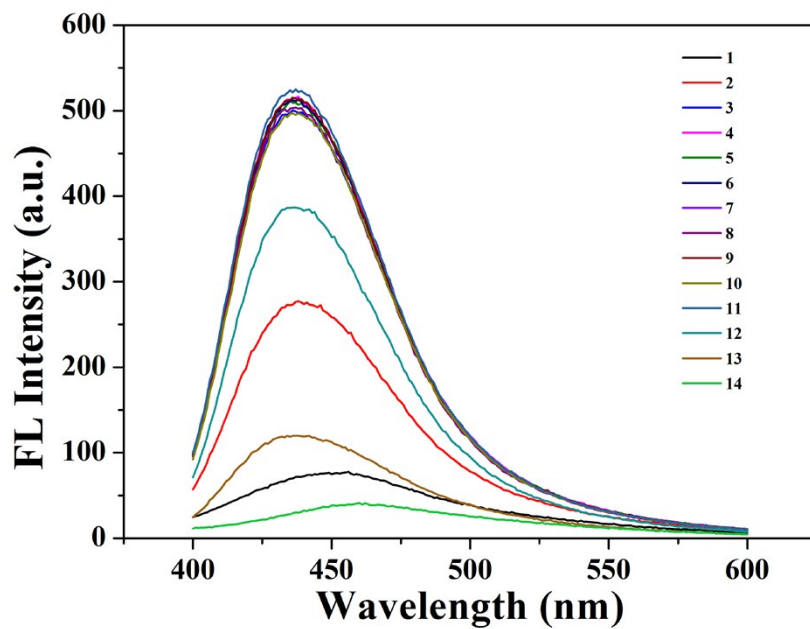

**Fig. S3** Fluorescence emission spectra at different pH conditions ranged from 1 to 14 ( $\lambda_{\text{ex}} = 350$  nm).

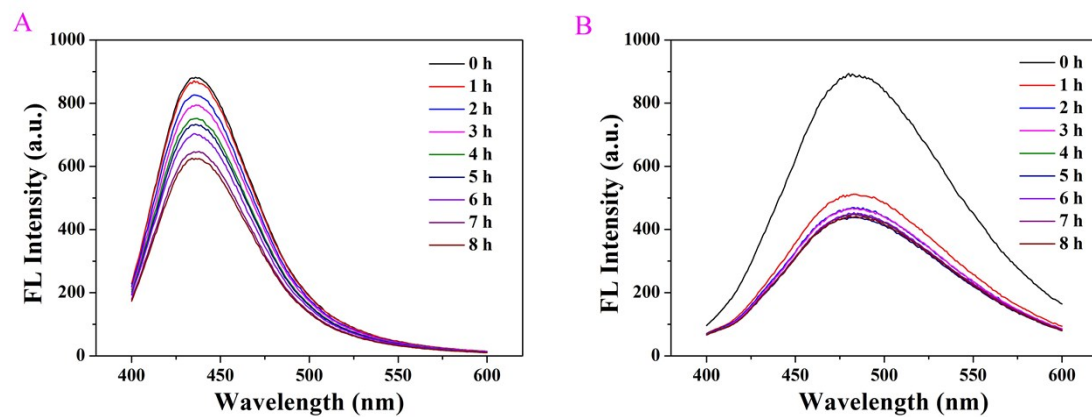

**Fig. S4** Fluorescence emission spectra of CNs (A) and DAPI (B) underwent continuous UV exposure of 1~ 8 h.

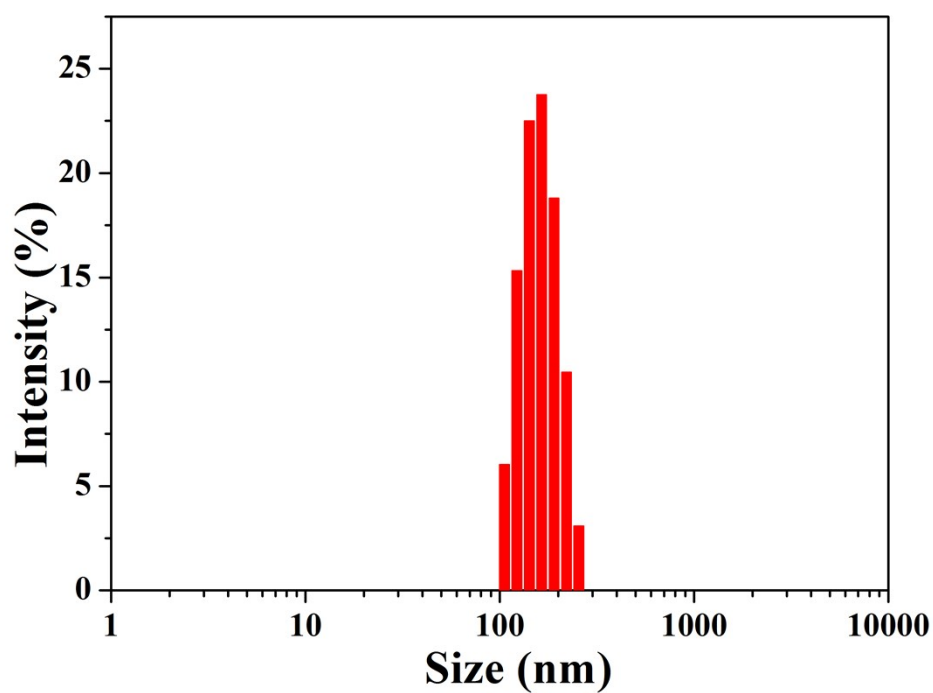

**Fig. S5** Size distribution of glycine conjugated CNs measured by DLS.

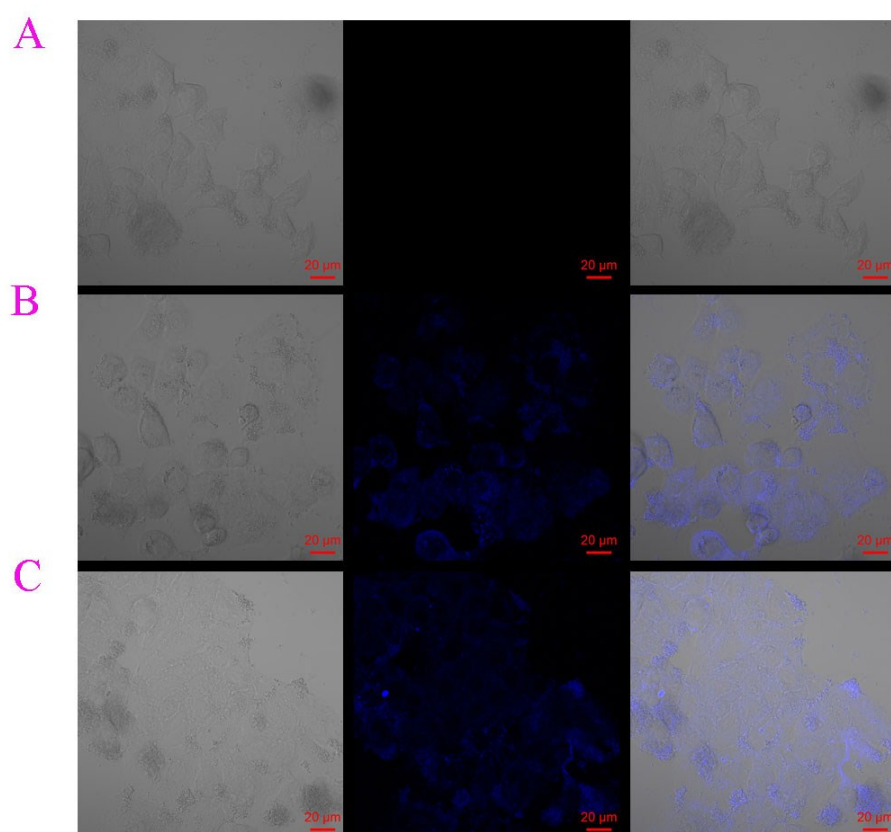

**Fig. S6** Confocal imaging of HepG-2 cells: non-treated cells (A), cells treated by CNs (B) or glycine conjugated CNs (C) with a CN's concentration of  $200 \mu\text{g}\cdot\text{mL}^{-1}$  for 3 h at  $37^\circ\text{C}$ .
